# Supplementary material
Source: PubMed Central journal article supplement (PMC4093903)
Supplement: NIHMS595799-supplement-01.pdf [file NIHMS595799-supplement-01.pdf]

## Supplemental Table S1

*Summary of existing research using versions of the ACSS*

| Authors, year            | N                                                                                      | Version            | $\alpha$    | Findings                                                                                                                                                                                                                                               |
|--------------------------|----------------------------------------------------------------------------------------|--------------------|-------------|--------------------------------------------------------------------------------------------------------------------------------------------------------------------------------------------------------------------------------------------------------|
| Van Orden et al., 2008   | 228 adult outpatients;<br>153 adult outpatients                                        | 5-item             | .67;<br>.68 | PPES significantly predicted ACSS, controlling for age, gender, BDI, BSS; ACSS interacted with INQ-Perceived Burdensomeness to predict clinician-rated risk                                                                                            |
| Bryan et al., 2010       | 522 service members                                                                    | 5-item             | .71         | Greater combat exposure predicts ACSS, beyond depression, PTSD, and previous suicidality                                                                                                                                                               |
| Bryan et al., 2010       | 88 active-duty US Air Force personnel;<br>309 undergraduates;<br>228 adult outpatients | 5-item             | NR          | Active duty personnel had higher level of acquired capability than civilians; ACSS interacted with burdensomeness to predict suicidal history                                                                                                          |
| Davidson et al., 2010a   | 129 undergraduates                                                                     | 5-item             | NR          | ACSS associated with having higher levels of hope                                                                                                                                                                                                      |
| Davidson et al., 2010b   | 115 African-American undergraduates                                                    | 20-item            | .84         | Hope significantly predicted ACSS; Interaction of INQ-Thwarted Belongingness, INQ-Perceived Burdensomeness and ACSS associated with suicidal ideation                                                                                                  |
| Smith et al., 2010       | 15 suicide ideators;<br>15 suicide attempters;<br>14 non-suicidal controls             | 20-item            | .88         | Suicide attempters had greater ACSS scores than ideators; no significant difference between attempters and controls on ACSS; no significant difference in startle response to suicide-related imagery compared to neutral imagery                      |
| Anestis et al., 2011     | 200 undergraduates                                                                     | 20-item            | NR          | Males demonstrated higher levels of acquired capability than women; distress tolerance interacted with sex to predict ACSS, such that males with highest distress tolerance were at greatest risk                                                      |
| Anestis et al., 2011     | 283 undergraduates                                                                     | 20-item            | .84         | ACSS associated with negative urgency but not distress tolerance; high distress tolerance associated with high physical pain tolerance                                                                                                                 |
| Anestis & Joiner, 2011   | 492 adult outpatients                                                                  | 6-item             | .65         | 4-way interaction of negative urgency and three components of the theory predicting suicide attempts, controlling for depression and sex                                                                                                               |
| Anestis et al., 2011     | 358 adult outpatients                                                                  | 5-item             | .63         | Painful and provocative dysregulated behaviors fully accounted for the relationship between negative urgency and acquired capability.                                                                                                                  |
| Bender et al., 2011      | 182 undergraduates;<br>516 adult outpatients                                           | 20-item;<br>6-item | .83;<br>.90 | Impulsivity indirectly related to acquired capability (measured using ACSS and pain tolerance) through PPES                                                                                                                                            |
| Bryan & Anestis, 2011    | 157 military personnel                                                                 | 5-item             | .66         | Re-experiencing symptoms of PTSD have direct association with ACSS                                                                                                                                                                                     |
| Bryan & Cukrowicz, 2011  | 348 US Air Force deployed personnel                                                    | 5-item             | .66         | ACSS was associated with all forms of combat exposure; combat exposure involving aggression and high levels of exposure to death and injury demonstrate stronger associations with ACSS compared to combat experiences not involving exposure to death |
| Davidson & Wingate, 2011 | 129 undergraduates;<br>115 African-American undergraduates                             | 5-item             | .66;<br>.67 | Males demonstrated significantly higher levels of ACSS                                                                                                                                                                                                 |
| Franklin et al., 2011    | 67 young adults                                                                        | 20-item            | NR          | ACSS associated with pain threshold and pain intensity at tolerance; NSSI associated                                                                                                                                                                   |

|                           |                                                                               |                                |                     |                                                                                                                                                                                                                                                                            |
|---------------------------|-------------------------------------------------------------------------------|--------------------------------|---------------------|----------------------------------------------------------------------------------------------------------------------------------------------------------------------------------------------------------------------------------------------------------------------------|
| Freedenthal et al., 2011  | 785 undergraduates                                                            | 5-item                         | .72                 | with higher ACSS scores and decreased pain perception; pain tolerance mediates relationship between painful and provocative events and ACSS scores<br>Correlation ( $r=.13$ ) between Perceived Burdensomeness subscale of 12 item version of INQ                          |
| Gordon et al., 2011       | 210 undergraduates                                                            | 20-item                        | .81                 | Number of hours spent volunteering for Red River flood efforts significantly predicted ACSS in the positive direction                                                                                                                                                      |
| Rasmussen & Wingate, 2011 | 452 undergraduates                                                            | 20-item                        | .83                 | Suicidal ideation was not significantly associated with ACSS                                                                                                                                                                                                               |
| Anestis & Joiner, 2012    | 283 undergraduates                                                            | 20-item                        | .84                 | Distress tolerance was positively associated with ACSS; distress tolerance and exposure to painful and/or provocative experiences significantly predicted acquired capability, with strength of association increasing at higher levels of distress tolerance              |
| Bryan et al., 2013        | 133 military, 4 civilian TBI outpatients;                                     | 5-item                         | .72;<br>NR          | INQ-Perceived burdensomeness and ACSS were associated with increased suicidality and the relationship between suicidality and ACSS strengthened as perceived burdensomeness increased in both samples                                                                      |
| Fink et al., 2012         | 55 military outpatients<br>342 female outpatients                             | 5-item                         | .67                 | As expect, significant negative relationship existed between anxiety sensitivity-physical concerns was associated with acquired capability; anxiety physical concerns moderate the relationship between disordered eating and ACSS, controlling for BDI, BAI, UPPS-Urgency |
| Smith et al., 2012        | 171 undergraduates;<br>467 undergraduates;<br>512 undergraduates              | 20-item;<br>20-item;<br>8-item | .85;<br>.82;<br>.73 | Greater over-exercise predicted ACSS scores at follow-up; pain insensitivity accounted for relationship between over-exercise and ACSS; ACSS scores accounted for relationship between over-exercise and suicidal behavior                                                 |
| Witte et al., 2012        | 185 undergraduates;<br>378 undergraduates                                     | 7-item                         | .86;<br>.75         | Men demonstrated higher fearlessness about death and pain tolerance than women; stoicism accounted for the relationship between gender and pain insensitivity; sensation seeking accounted for relationship between gender and fearlessness about death                    |
| Witte et al., 2013        | 130 veterinary students                                                       | 7-item                         | .85                 | Experience with euthanasia is associated with fearlessness about death but not physical pain tolerance among veterinary students                                                                                                                                           |
| Bryan et al., 2013        | 348 nonclinical active-duty military;<br>219 active-duty military outpatients | 5-item                         | .66;<br>.69         | Greater combat exposure was directly associated with ACSS scores and PTSD symptom severity in both samples but failed to show either an effect on suicide risk                                                                                                             |
| Smith et al., 2013        | 399 male adult inmates                                                        | 20-item                        | NR                  | Four-factor model provided best statistical fit to ACSS data in male prison inmates                                                                                                                                                                                        |

*Note.* ACSS = Acquired Capability for Suicide Scale; PTSD = Post-traumatic Stress Disorder; PPES = Painful and Provocative Events Scale; BDI = Beck Depression Inventory; BAI = Beck Anxiety Inventory; INQ = Interpersonal Needs Questionnaire; BSS = Beck Scale for Suicidal Ideation; DSI-SS = Suicidality Subscale of the Depressive Symptoms Index; UPPS-Urgency = Negative Urgency subscale of the Urgency, (lack of) Planning, (lack of) Premeditation, Sensation Seeking scale; NR = Not reported.

### Supplemental References

- Anestis, M. D., Bagge, C. L., Tull, M. T., & Joiner, T. E. (2011). Clarifying the role of emotion dysregulation in the interpersonal-psychological theory of suicidal behavior in an undergraduate sample. *Journal of psychiatric research, 45*(5), 603-611.
- Anestis, M., Bender, T. W., Selby, E. A., Ribeiro, J. D., & Joiner, T. E. (2011). Sex and emotion in the acquired capability for suicide. *Archives of Suicide Research, 15*(2), 172-182.
- Anestis, M., Fink, E., Bender, T., Selby, E., Smith, A., Witte, T., & Joiner, T. (2012). Re-considering the association between negative urgency and suicidality. *Personality and Mental Health.*
- Anestis, M. D., & Joiner, T. E. (2011). Examining the role of emotion in suicidality: Negative urgency as an amplifier of the relationship between components of the interpersonal-psychological theory of suicidal behavior and lifetime number of suicide attempts. *Journal of affective disorders, 129*(1), 261-269.
- Anestis, M. D., & Joiner, T. E. (2012). Behaviorally-indexed distress tolerance and suicidality. *Journal of psychiatric research.*
- Bender, T., Gordon, K., Bresin, K., & Joiner, T. (2011). Impulsivity and suicidality: The mediating role of painful and provocative experiences. *Journal of Affective Disorders, 129*, 301-307.
- Bryan, C., & Anestis, M. (2011). Reexperiencing symptoms and the interpersonal-psychological theory of suicidal behavior among deployed service members evaluated for traumatic brain injury. *Journal of clinical psychology, 67*(9), 856-865.
- Bryan, C., Cukrowicz, K., West, C., & Murrow, C. (2010). Combat experience and the acquired capability for suicide. *Journal of Clinical Psychology, 66*(10), 1044-1056.

- Bryan, C. J., Hernandez, A. M., Allison, S., & Clemans, T. (2013). Combat exposure and suicide risk in two samples of military personnel. *Journal of clinical psychology, 69*(1), 64-77.
- Bryan, C. J., Morrow, C. E., Anestis, M. D., & Joiner, T. E. (2010). A preliminary test of the interpersonal-psychological theory of suicidal behavior in a military sample. *Personality and Individual Differences, 48*(3), 347-350.
- Bryan, C. J., & Cukrowicz, K. C. (2011). Associations between types of combat violence and the acquired capability for suicide. *Suicide and Life-Threatening Behavior, 41*(2), 126-136.
- Davidson, C. L., Wingate, L. R., Rasmussen, K. A., & Slish, M. L. (2009). Hope as a predictor of interpersonal suicide risk. *Suicide and Life-Threatening Behavior, 39*(5), 499-507.
- Davidson, C. L., Wingate, L. R., Slish, M. L., & Rasmus, K. A. (2010). The great Black hope: Hope and its relation to suicide risk among African Americans. *Suicide and Life-Threatening Behavior, 40*(2), 170-180.
- Davidson, C. L., & Wingate, L. R. (2011). Racial disparities in risk and protective factors for suicide. *Journal of Black Psychology, 37*(4), 499-516.
- Fink, E., Bodell, L., Smith, A., & Joiner, T. (2012). The Joint Influence of Disordered Eating and Anxiety Sensitivity on the Acquired Capability for Suicide. *Cognitive Therapy and Research, 1*-7.
- Franklin, J. C., Hessel, E. T., & Prinstein, M.J. (2011). Clarifying the role of pain tolerance in suicidal capability. *Psychiatry Research, 189*(3), 362-367.
- Freedenthal, S., Lamis, D. A., Osman, A., Kahlo, D., & Gutierrez, P. M. (2011). Evaluation of the psychometric properties of the Interpersonal Needs Questionnaire-12 in samples of men and women. *Journal of clinical psychology, 67*(6), 609-623.

- Gordon, K. H., Bresin, K., Dombeck, J., Routledge, C., & Wonderlich, J. A. (2011). The impact of the 2009 Red River Flood on interpersonal risk factors for suicide. *Crisis: The Journal of Crisis Intervention and Suicide Prevention*, *32*(1), 52.
- Rasmussen, K. A., & Wingate, L. R. (2011). The Role of Optimism in the Interpersonal-Psychological Theory of Suicidal Behavior. *SLTB*, *41*(2), 137-148.
- Smith, A. R., Fink, E. L., Anestis, M. D., Ribeiro, J. D., Gordon, K. H., Davis, H., ... & Joiner, T. E. (2012). Exercise caution: Over-exercise is associated with suicidality among individuals with disordered eating. *Psychiatry research*.
- Smith, P., Cukrowicz, K., Poindexter, E., Hobson, V., & Cohen, L. (2010). The acquired capability for suicide: a comparison of suicide attempters, suicide ideators, and non-suicidal controls. *Depression and Anxiety*, *27*, 871-877.
- Smith, P. N., Wolford-Clevenger, C., Mandracchia, J. T., & Jahn, D. R. (2013). An exploratory factor analysis of the Acquired Capability for Suicide Scale in male prison inmates. *Psychological services*, *10*(1), 97.
- Van Orden, K., Witte, T., Gordon, K., Bender, T., & Joiner, T., Jr. (2008). Suicidal desire and the capability for suicide: Tests of the Interpersonal-Psychological Theory of Suicidal Behavior among adults. *Journal of Consulting and Clinical Psychology*, *76*, 72-83.
- Van Orden, K., Witte, T., Cukrowicz, K., Braithwaite, S., Selby, E., & Joiner, T. (2010). The Interpersonal Theory of Suicide. *Psychological Review*, *117*(2), 575-600.
- Witte, T. K., Correia, C. J., & Angarano, D. (2013). Experience with Euthanasia is Associated with Fearlessness about Death in Veterinary Students. *Suicide and Life-Threatening Behavior*, *43*, 125-138.

Witte, T., Gordon, K., Smith, P., & Van Orden, K. (2012). Stoicism and sensation seeking: Male vulnerabilities for the acquired capability for suicide. *Journal of Research in Personality*, 46, 384-392.

## Supplemental Table S2

*Acquired Capability for Suicide Scale Items*

| Items                                                                                                                    |
|--------------------------------------------------------------------------------------------------------------------------|
| 1. Things that scare most people do not scare me.                                                                        |
| 2. The sight of my own blood does not bother me.                                                                         |
| 3. I avoid certain situations (e.g., certain sports) because of the possibility of injury.<br>(R)                        |
| 4. I can tolerate a lot more pain than most people.                                                                      |
| 5. People describe me as fearless.                                                                                       |
| 6. The sight of blood bothers me a great deal. (R)                                                                       |
| 7. <b><i>The fact that I am going to die does not affect me.</i></b>                                                     |
| 8. <b><i>The pain involved in dying frightens me. (R)</i></b>                                                            |
| 9. Killing animals in a science course would not bother me.                                                              |
| 10. <b><i>I am very much afraid to die. (R)</i></b>                                                                      |
| 11. <b><i>It does not make me nervous when people talk about death.</i></b>                                              |
| 12. The sight of a dead body is horrifying to me. (R)                                                                    |
| 13. <b><i>The prospect of my own death arouses anxiety in me. (R)</i></b>                                                |
| 14. <b><i>I am not disturbed by death being the end of life as I know it.</i></b>                                        |
| 15. I like watching the aggressive contact in sports games.                                                              |
| 16. The best parts of hockey games are the fights.                                                                       |
| 17. When I see a fight, I stop to watch.                                                                                 |
| 18. I prefer to shut my eyes during the violent parts of movies. (R)                                                     |
| 19. <b><i>I am not at all afraid to die.</i></b>                                                                         |
| 20. I could kill myself if I wanted to. (Even if you have never wanted to kill yourself,<br>please answer the question.) |

*Note.* Items in bold and italicized comprise the Acquired Capability for Suicide Scale – Fearlessness About Death (ACSS-FAD); (R) denotes a reverse-scored item.

## Supplemental Table S3

*Summary of Information Regarding Convenience Samples*

| Sample | Primary Source                 | Original Research Aims                                           | N                   | ACSS-FAD     |          | Current Study Aims Addressed                                                    |
|--------|--------------------------------|------------------------------------------------------------------|---------------------|--------------|----------|---------------------------------------------------------------------------------|
|        |                                |                                                                  |                     | M (SD)       | $\alpha$ |                                                                                 |
| 1      | Teale, 2010                    | Effects of social exclusion on self-injurious behavior           | 227 young adults    | 15.11 (6.54) | .82      | Aim 1: Measurement model development                                            |
| 2      | Bender et al., 2011            | Relationship between impulsivity & suicidal behavior             | 257 young adults    | 14.98 (6.11) | .77      | Aim 1: Measurement model development<br>Aim 3: Convergent/Discriminant validity |
| 3      | Van Orden, 2009                | Measure development of the Interpersonal Needs Questionnaire     | 723 young adults    | 14.18 (6.29) | .83      | Aim 1: Measurement model development<br>Aim 2: Measurement invariance           |
| 4      | Witte, Ribeiro, & Joiner, 2010 | Relationship between personality, pain perception, & suicidality | 193 young adults    | 13.24 (6.31) | .85      | Aim 3: Convergent/Discriminant validity                                         |
| 5      | Ribeiro & Joiner, 2013         | Factors of acute suicide risk                                    | 67 adult inpatients | 15.67(7.56)  | .81      | Aim 3: Convergent/Discriminant validity                                         |

**References**

- Bender, T., Gordon, K., Bresin, K., & Joiner, T. (2011). Impulsivity and suicidality: The mediating role of painful and provocative experiences. *Journal of Affective Disorders, 129*, 301-307.
- Ribeiro & Joiner. (2013). *Examining overarousal states in acute suicide risk in a sample of psychiatric inpatients*. Unpublished manuscript, Department of Psychology, Florida State University, FL.
- Teale, N. E. (2010). *Self-Verification and Self-Aggression: The Negative Consequences of Receiving Positive Feedback*. (Unpublished doctoral dissertation). Florida State University, FL.
- Van Orden, K. A. (2009). *Construct validity of the Interpersonal Needs Questionnaire*. (Unpublished doctoral dissertation). Florida State University, FL.



Witte, T., Ribeiro, J., & Joiner, T. (2010). *Personality, pain perception and suicidal behavior*. Unpublished manuscript. Department of Psychology, Florida State University, FL.

Supplemental Table S4

*Descriptive Statistics and Inter-Item Correlations, Samples 1-5*

| Item                    | Content         | 1     | 2     | 3     | 4     | 5     | 6     | 7     | M     | SD   | Skew | Kurtosis |
|-------------------------|-----------------|-------|-------|-------|-------|-------|-------|-------|-------|------|------|----------|
| <u>Sample 1(n=227)</u>  |                 |       |       |       |       |       |       |       |       |      |      |          |
| ACSS 7                  | Death as fact   | 1.00  |       |       |       |       |       |       | 1.95  | 1.25 | .05  | -.92     |
| ACSS 8                  | Pain in dying   | .19** | 1.00  |       |       |       |       |       | 2.14  | 1.37 | -.09 | -1.21    |
| ACSS 10                 | Afraid to die   | .53** | .49** | 1.00  |       |       |       |       | 2.45  | 1.32 | -.49 | -.85     |
| ACSS 11                 | Death talk      | .36** | .12*  | .26** | 1.00  |       |       |       | 2.33  | 1.37 | -.26 | -1.18    |
| ACSS 13                 | Death anxiety   | .39** | .49** | .65** | .20** | 1.00  |       |       | 2.47  | 1.27 | -.36 | -1.01    |
| ACSS 14                 | End of life     | .47** | .19** | .35** | .38** | .28** | 1.00  |       | 2.06  | 1.37 | -.15 | -1.17    |
| ACSS 19                 | Lack death fear | .58** | .37** | .62** | .45** | .46** | .44** | 1.00  | 1.70  | 1.29 | .31  | -.97     |
|                         |                 |       |       |       |       |       |       | Total | 15.11 | 6.54 | -.09 | -.61     |
| <u>Sample 2 (n=257)</u> |                 |       |       |       |       |       |       |       |       |      |      |          |
| ACSS 7                  | Death as fact   | 1.00  |       |       |       |       |       |       | 1.16  | 1.15 | .46  | -1.25    |
| ACSS 8                  | Pain in dying   | .14** | 1.00  |       |       |       |       |       | 1.30  | 1.13 | .26  | -1.32    |
| ACSS 10                 | Afraid to die   | .44** | .45** | 1.00  |       |       |       |       | 1.59  | 1.11 | -.06 | -1.35    |
| ACSS 11                 | Death talk      | .33** | .26** | .25** | 1.00  |       |       |       | 2.31  | 1.40 | -.30 | -1.17    |
| ACSS 13                 | Death anxiety   | .33** | .43** | .60** | .34** | 1.00  |       |       | 1.47  | 1.05 | .01  | -1.21    |
| ACSS 14                 | End of life     | .24** | .13** | .32** | .32** | .25** | 1.00  |       | 1.09  | 1.09 | .49  | -1.11    |
| ACSS 19                 | Lack death fear | .51** | .33** | .58** | .27** | .52** | .32** | 1.00  | 1.00  | 1.05 | .65  | -.85     |
|                         |                 |       |       |       |       |       |       | Total | 14.98 | 6.11 | -.25 | -.17     |
| <u>Sample 3 (n=723)</u> |                 |       |       |       |       |       |       |       |       |      |      |          |
| ACSS 7                  | Death as fact   | 1.00  |       |       |       |       |       |       | 1.88  | 1.31 | .08  | -1.05    |
| ACSS 8                  | Pain in dying   | .34** | 1.00  |       |       |       |       |       | 2.35  | 1.25 | .03  | -1.09    |
| ACSS 10                 | Afraid to die   | .39** | .32** | 1.00  |       |       |       |       | 1.84  | 1.31 | -.28 | -.96     |
| ACSS 11                 | Death talk      | .61** | .39** | .44** | 1.00  |       |       |       | 1.57  | 1.26 | -.30 | -.88     |
| ACSS 13                 | Death anxiety   | .29** | .30** | .20** | .39** | 1.00  |       |       | 1.97  | 1.31 | -.24 | -.99     |
| ACSS 14                 | End of life     | .54** | .38** | .37** | .62** | .52** | 1.00  |       | 2.25  | 1.29 | .09  | -1.10    |
| ACSS 19                 | Lack death fear | .43** | .29** | .27** | .47** | .42** | .54** | 1.00  | 2.33  | 1.27 | .34  | -.89     |
|                         |                 |       |       |       |       |       |       | Total | 14.18 | 6.29 | -.14 | -.47     |
| <u>Sample 4 (n=193)</u> |                 |       |       |       |       |       |       |       |       |      |      |          |
| ACSS 7                  | Death as fact   | 1.00  |       |       |       |       |       |       | 1.72  | 1.21 | .34  | -.72     |
| ACSS 8                  | Pain in dying   | .41** | 1.00  |       |       |       |       |       | 1.93  | 1.23 | .18  | -.91     |
| ACSS 10                 | Afraid to die   | .54** | .56** | 1.00  |       |       |       |       | 2.10  | 1.26 | -.16 | -.97     |
| ACSS 11                 | Death talk      | .46** | .35** | .47** | 1.00  |       |       |       | 2.16  | 1.22 | -.05 | -1.04    |
| ACSS 13                 | Death anxiety   | .38** | .44** | .60** | .43** | 1.00  |       |       | 2.19  | 1.23 | -.19 | -.89     |

|                        |                 |       |       |       |       |       |       |       |       |      |      |       |
|------------------------|-----------------|-------|-------|-------|-------|-------|-------|-------|-------|------|------|-------|
| ACSS 14                | End of life     | .33** | .25** | .37** | .32** | .25** | 1.00  |       | 1.72  | 1.30 | .30  | -.98  |
| ACSS 19                | Lack death fear | .61** | .52** | .68** | .48** | .48** | .45** | 1.00  | 1.46  | 1.23 | .42  | -.86  |
|                        |                 |       |       |       |       |       |       | Total | 13.24 | 6.31 | .06  | -.51  |
| <u>Sample 5 (n=67)</u> |                 |       |       |       |       |       |       |       |       |      |      |       |
| ACSS 7                 | Death as fact   | 1.00  |       |       |       |       |       |       | 2.18  | 1.70 | -.21 | -1.68 |
| ACSS 8                 | Pain in dying   | .11   | 1.00  |       |       |       |       |       | 2.08  | 1.62 | -.04 | -1.63 |
| ACSS 10                | Afraid to die   | .32** | .64** | 1.00  |       |       |       |       | 2.55  | 1.55 | -.52 | -1.21 |
| ACSS 11                | Death talk      | .61** | .03   | .29** | 1.00  |       |       |       | 2.12  | 1.60 | -.07 | -1.57 |
| ACSS 13                | Death anxiety   | .24*  | .56** | .53** | .16   | 1.00  |       |       | 2.55  | 1.48 | -.53 | -1.17 |
| ACSS 14                | End of life     | .58** | .13   | .27   | .43** | .11   | 1.00  |       | 2.30  | 1.55 | -.22 | -1.49 |
| ACSS 19                | Lack death fear | .67** | .27*  | .42** | .53** | .32** | .56** | 1.00  | 2.13  | 1.66 | -.14 | -1.63 |
|                        |                 |       |       |       |       |       |       | Total | 15.67 | 7.56 | .17  | -.98  |

Note. \* p<.05; \*\*p<.01.

## Supplemental Table S5

*Factor Loadings, Standardized Residuals, and Communalities for Single Group CFAs (Sample 3)*

| Item                   | Content         | Standardized Loadings |      |           | Standardized Residuals |      |           | h <sup>2</sup> |
|------------------------|-----------------|-----------------------|------|-----------|------------------------|------|-----------|----------------|
|                        |                 | Estimate              | S.E. | Est./S.E. | Estimate               | S.E. | Est./S.E. |                |
| <b>Females (n=401)</b> |                 |                       |      |           |                        |      |           |                |
| ACSS 7                 | Death as fact   | .74                   | .03  | 23.26     | .45                    | .05  | 9.42      | .55            |
| ACSS 8                 | Pain in dying   | .55                   | .05  | 10.93     | .70                    | .06  | 12.50     | .30            |
| ACSS 10                | Afraid to die   | .76                   | .03  | 27.72     | .42                    | .05  | 8.49      | .58            |
| ACSS 11                | Death talk      | .50                   | .05  | 9.88      | .75                    | .05  | 14.77     | .25            |
| ACSS 13                | Death anxiety   | .67                   | .04  | 17.15     | .55                    | .05  | 10.64     | .45            |
| ACSS 14                | End of life     | .52                   | .05  | 10.09     | .73                    | .05  | 13.77     | .27            |
| ACSS 19                | Lack death fear | .83                   | .02  | 40.13     | .31                    | .03  | 9.20      | .69            |
| <b>Males (n=322)</b>   |                 |                       |      |           |                        |      |           |                |
| ACSS 7                 | Death as fact   | .62                   | .05  | 13.03     | .62                    | .06  | 10.31     | .39            |
| ACSS 8                 | Pain in dying   | .52                   | .06  | 8.91      | .73                    | .06  | 12.23     | .27            |
| ACSS 10                | Afraid to die   | .84                   | .03  | 28.62     | .29                    | .05  | 5.96      | .71            |
| ACSS 11                | Death talk      | .46                   | .06  | 7.76      | .79                    | .06  | 14.39     | .21            |
| ACSS 13                | Death anxiety   | .55                   | .06  | 9.33      | .70                    | .06  | 10.85     | .30            |
| ACSS 14                | End of life     | .45                   | .06  | 7.62      | .80                    | .05  | 15.25     | .20            |
| ACSS 19                | Lack death fear | .73                   | .04  | 20.12     | .47                    | .05  | 8.80      | .53            |

*Note.* All parameters are statistically significant with a cutoff of Est/S.E. = 1.96.
